# Supplementary material for: Knowledge-based compact disease models identify new molecular players contributing to early-stage Alzheimer’s disease
Source: Springer Nature journal article supplement (doi:10.1186/1752-0509-7-121), 2013-01-01

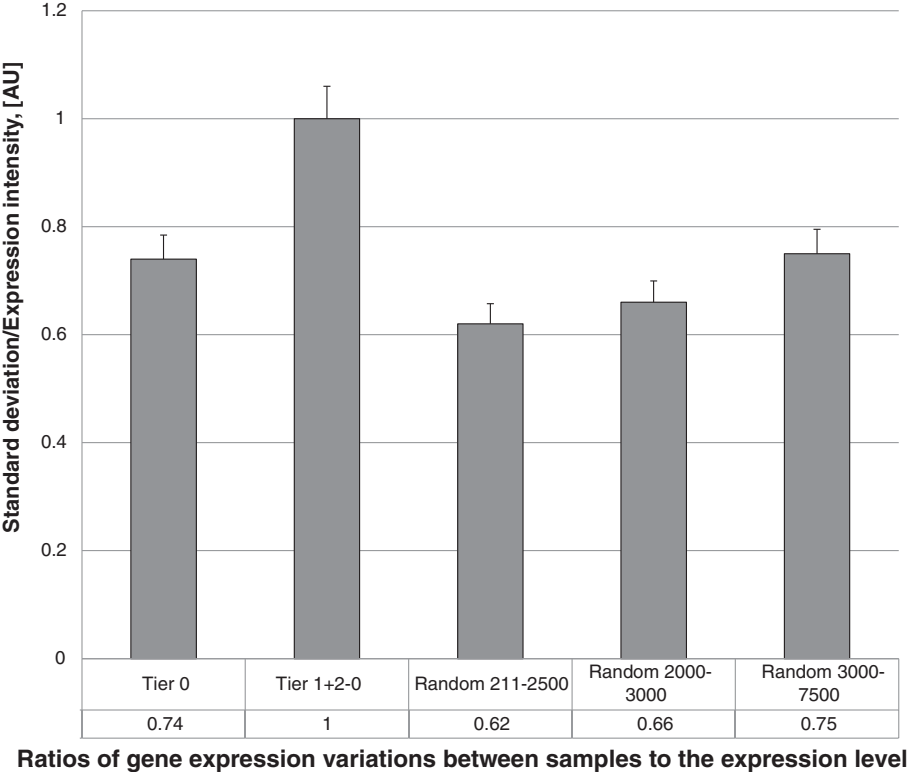

Supplement: 12918_2013_1203_MOESM8_ESM.pdf [file 12918_2013_1203_MOESM8_ESM.pdf]
